1           New genotypic adaptability and stability analyses using  
2           Legendre polynomials and genotype-ideotype distances

3  
4   Michel Henriques de Souza<sup>1\*</sup>, José Domingos Pereira Júnior<sup>1</sup>, Skarlet De Marco Steckling<sup>2</sup>,  
5   Jussara Mencialha<sup>1</sup>, Fabíola dos Santos Dias<sup>1</sup>, João Romero do Amaral Santos de Carvalho  
6   Rocha<sup>2</sup>, Pedro Crescêncio Souza Carneiro<sup>2</sup>, José Eustáquio de Souza Carneiro<sup>1</sup>

7  
8   <sup>1</sup>Departamento de Agronomia, Universidade Federal de Viçosa, Viçosa, CEP: 36570-900,  
9   Minas Gerais, Brazil.

10   <sup>2</sup>Departamento de Biologia Geral, Universidade Federal de Viçosa, Viçosa, CEP: 36570-900,  
11   Minas Gerais, Brazil.

12  
13   \* Corresponding author - email: [micheel.1992@gmail.com](mailto:micheel.1992@gmail.com)

## 33 **Introduction**

34

35           The main objective of a crop breeding program, is to develop cultivars that can replace  
36 those that are currently available [1]. In the final stages of a breeding program, the most  
37 promising lines are evaluated in trials conducted in different environments, such as different  
38 years, places, and seasons. In Brazil, these tests are called Valor de Cultivo e Uso (VCU), and  
39 their results are the basis for the cultivar recommendation [2].

40           Adaptability and stability studies are used to quantify the performances of the genotypes  
41 to make recommendations [3]. Adaptability is defined as the ability of a genotype to respond  
42 advantageously to its environment, while its stability is related to the predictability of its  
43 behavior [4,5]. It is thus possible to identify genotypes that have wide or specific adaptability  
44 to favorable or unfavorable environments. Finlay and Wilkinson [4] defined favorable and  
45 unfavorable environments as those that result in the average performance of the genotype being  
46 above or below the average of all the trials, respectively.

47           Genotypes that have specific adaptability to favorable environments, have genes that  
48 enable them to respond to improved environmental conditions, and should be recommended to  
49 farmers who wish to utilize the most current technologies. Genotypes with specific adaptability  
50 to unfavorable environments however, may have specific genes that enable them to grow in  
51 these environments. These are rustic genotypes and should be recommended to farmers who  
52 utilize lower level technologies. In general, rustic genotypes have more genes that tolerate biotic  
53 and abiotic stresses, which means they may be favored in more adverse environmental  
54 conditions.

55           In recent decades, several methods to analyze adaptability and stability have been  
56 proposed, based on different statistical principles. To identify genotypes that have general or

57 specific adaptability to favorable (requires a high level of technology) or unfavorable (requires  
58 a low level of technology) environments, methodologies that are based on linear regression  
59 models have shown promise [4–7]. Some of the previous methods to determine the adaptability  
60 and stability included the ideotype concept [8–11], and resulted in an improved understanding  
61 of the relative behavior of the genotypes from a smaller number of parameters. According to  
62 Eeuwijk et al. [12], there are other methodologies to assess the behavior of genotypes that are  
63 of note, such as AMMI (Additive Main effects and Multiplicative Interaction) [13] and GGE  
64 biplot (Genotype main effects and Genotype x Environment interaction effects) [14]. However,  
65 the adaptability and stability analyses still have limitations, especially when used with trials  
66 with genetic or statistical imbalances, heterogeneity of residual variances, and genetic  
67 covariance. In this context, adaptability and stability analyses that use a mixed model approach  
68 are an effective alternative to the traditional analyses [15,16].

69 Another relevant factor is that traditional methodologies for the analysis of adaptability  
70 and stability, consider a priori, that the behavior of a genotype across environments is linear,  
71 which may not be true. As a consequence, recommendations based on these methodologies can  
72 be biased. This can be outlined by means of reaction norm models via mixed modeling, as they  
73 allow for improved modeling of the behavior of the different genotypes, based mostly on  
74 orthogonal polynomials. Among this class of polynomials, the Legendre's polynomials stand  
75 out, as they have the ability to describe the structures of variance and covariance between the  
76 genetic and environmental components [17].

77 In this way, the use of the reaction norms obtained from the Legendre polynomials can  
78 better quantify the adaptability and stability of a set of genotypes evaluated in different  
79 environments, aiming for greater accuracy in cultivar recommendations. Thus, the objectives  
80 of this investigation were to propose a new methodology for the analysis of adaptability and  
81 genotypic stability, based on Legendre polynomials and genotype-ideotype distances.

82

## 83 **Methods description (step by step)**

84

### 85 **Step one: Environmental gradient**

86

87         The first step is the classification of the trials as an environmental gradient. To define  
88 this gradient, trials in which the genotypes are evaluated must be ordered a priori, according to  
89 certain classification criteria such as Akaike Information Criterion (AIC) [18], Bayesian  
90 Information Criterion (BIC) [19], and Penalizing Adaptively the Likelihood (PAL) [20]. We  
91 consequently recommend the index proposed by Finlay and Wilkinson [4], since the  
92 adaptability of a genotype is its ability to respond to environmental improvements. The  
93 environmental index was determined as follows:

94

$$95 \quad I_j = (\bar{Y}_j - \bar{Y}) \quad (1)$$

96

97 where  $\bar{Y}_j$  is the average of the genotypes  $j$ -th trial ( $j = 1, 2, \dots, na$ , where  $na$  is the total number  
98 of trials) and  $\bar{Y}$  is the general mean. Negative and positive index values indicate unfavorable  
99 and favorable trials, respectively.

100

### 101 **Step two: Fitting reaction norm models**

102

103           Once the environmental gradient is established, different reaction norm models must be  
104 adjusted to identify what best quantifies the behavior of the genotypes in the different trials.  
105 The number of models to be tested depends on the number of trials used (determines the  
106 maximum order of the polynomial), the number of effects included in the model via the  
107 Legendre polynomials, and the residual covariance structures.

108           For the trials conducted in randomized block designs, for example, the model to be  
109 adopted was as follows:

$$110 \quad y_{ijk} = A_j + R/A_{jk} + \sum_{m=0}^{M-1} \alpha_{im} \Phi_{ijm} + e_{ijk} \quad (2)$$

111

112 where:  $y_{ijk}$  is the observation of the  $i$ -th genotype ( $i = 1, 2, \dots, ng$ , where  $ng$  is the total number  
113 of genotypes), in the  $j$ -th trial ( $j = 1, 2, \dots, na$ , where  $na$  is the total number of trials), in the  $k$ -th  
114 block ( $k = 1, 2, 3$ );  $A_j$  is the effect of the trial;  $R/A_{jk}$  is the fixed effect of the blocks within each  
115 trial;  $\alpha_{im}$  is the reaction norm coefficient for the Legendre polynomial of order  $m$  for the  
116 genotypic effects of the genotypes;  $\Phi_{ijm}$  is Legendre's  $m$ -th polynomial for the  $j$ -th trial,  
117 standardized from -1 to +1 for the  $i$ -th genotype;  $M$  is the order of adjustment of the Legendre  
118 polynomial for genotypic effects; and  $e_{ijk}$  is the residual random effect associated with  $y_{ijk}$ .

119           In a matrix, the model above is described as:  $y = Xb + Zg + e$ , where:  $y$  is the vector  
120 of phenotypic data;  $b$  is the vector of the fixed effects of the combination of blocks  $\times$  trials  
121 added to the general average;  $g$  is the vector of genetic effects (assumed to be random); and  $e$   
122 is the residue vector (random).  $X$  and  $Z$  represent the incidence matrix for these effects,  
123 respectively. It is assumed that:  $g \sim N(0, Kg \otimes I_{ng})$ , and  $e \sim N(0, I_{np} \otimes \Sigma)$ , where  $I_{ng}$  and  $I_{np}$   
124 are identity matrices of the order  $ng$  ( $ng$  is the total number of genotypes) and  $np$  ( $np$  is the

125 number of genotypes x the number of blocks), respectively. The symbol  $\otimes$  denotes the  
126 Kronecker product.  $Kg$  is the matrix of covariance coefficients for genotypic effect.  $\Sigma$   
127 represents the matrix of residual variances.

128

### 129 **Step three: Choosing the best fit model**

130

131 To select the best fit model, criteria the AIC, BIC and PAL were utilized. These criteria  
132 are described as follows:

$$133 \quad AIC = -2\ln L + 2p \quad (3)$$

$$134 \quad BIC = -2\ln L + p\ln[n - r(x)] \quad (4)$$

$$135 \quad PAL = -2\ln L + n\ln(\tilde{n})^{\frac{\ln(r_n + 1)}{\ln(\rho_n + 1)}} \quad (5)$$

136 where;

$$137 \quad r_n = 2\ln L_{n-1} - 2\ln L_1$$

$$138 \quad \rho_n = 2\ln L_{\tilde{n}} - 2\ln L_{n-1}$$

139

140 and  $\ln L$  is the logarithm of the likelihood function;  $p$  is the number of estimated parameters;  $n$   
141 is the number of observations;  $r(x)$  is the rank of the fixed effects matrix; and  $\tilde{n}$  is the highest  
142 number of parameters for the models.

143

## 144 **Step four: Genetic effects significance**

145

146 To test the genetic effects, we utilized the Likelihood Ratio Test (LRT) [21], which is  
147 as follows:

148

$$149 \quad LRT = -2*(LogL_{mod,r} - LogL_{mod,c}) \quad (6)$$

150

151 where:  $LogL_{mod,r}$  is the logarithm value of the maximum likelihood function obtained for the  
152 reduced model (without the genotypic effect), and  $LogL_{mod,c}$  is the logarithm value of the  
153 maximum likelihood function obtained for the complete model.

154

## 155 **Step five: Genotypic values at the original scale**

156

157 To predict the genotypic values ( $\hat{g}_{ij}$  - BLUPs), we suggest the use of the following  
158 equation, as proposed by Kirkpatrick et al. (1990):

159

$$160 \quad \hat{g}_{ij} = \sum_{m=0}^{M-1} \hat{\alpha}_{im} \Phi_{ijm} \quad (7)$$

161

162 where:  $\hat{\alpha}_{im}$  is the reaction norm coefficient of order  $m$  for the genetic effects of the  $i$ -th genotype.

163 This equation includes a transformation to the original scale, as using the Legendre polynomials

164 as a covariate affects the scale of the genotypic values.

165

## 166 **Step six: Accuracy at the original scale**

167

168 The prediction accuracy, also in original scale, is estimated according to the following

169 equation:

$$170 \quad r_{\hat{g}g_{ij}} = \sqrt{1 - \frac{\Phi_{ijm} PEV_{ij} \Phi_{ijm}'}{\Phi_{ijm} \hat{K}_g \Phi_{ijm}'}} \quad (8)$$

171

172 where:  $r_{\hat{g}g_{ij}}$  is the correlation between the predicted and real genotype values for genotype  $i$  in

173 trial  $j$ , that is, the estimated accuracy;  $PEV_{ij}$  is the Predicted Error Variance of the estimated

174 coefficients for genotype  $i$  in trial  $j$ ;  $\hat{K}_g$  is the covariance matrix of the coefficients, estimated

175 for the genotypic effect.

176

## 177 **Step seven: Genotypic adaptability and stability**

178

179 To quantify the adaptability and stability of the genotypes, we proposed the use of the

180 genotype-ideotype distance (converted into probability), using four ideotypes: i) genotypes of

181 general adaptability (genotypes of maximum performance in both unfavorable and favorable



182 environments); ii) genotypes of maximum adaptability to unfavorable environments (genotypes  
183 of maximum performance in unfavorable environments, regardless of their performance in  
184 favorable environments); iii) genotypes of maximum adaptability to favorable environments  
185 (genotypes of maximum performance in favorable environments, regardless of their  
186 performance in unfavorable environments); and iv) genotypes with minimal adaptability.

187 From the genotypic values, the adaptability and stability of the genotypes were obtained,  
188 according to the estimator below:

189

$$190 \quad P_{ik} = \frac{\frac{1}{GID_{ik}}}{\sum_{i=1}^{ng} \frac{1}{GID_{ik}}} \quad (9)$$

191

192  $P_{ik}$  are the probabilities referring to genotype  $i$  with regard to ideotype  $k$  ( $k = 1, 2, 3, 4$ ; where  
193 1 = genotypes of general adaptability; 2 = genotypes of maximum adaptability to unfavorable  
194 environments; 3 = genotypes of maximum adaptability to favorable environments; and 4 =  
195 genotypes of minimal adaptability); and  $ng$  is the total number of genotypes.  $GID_{ik}$  is the  
196 standardized average Euclidean distance for genotype  $i$  in ideotype  $k$ , as given by:

197

$$198 \quad GID_{ik} = \sqrt{\frac{\sum_j [\hat{g}_{ij} - ide(\hat{g}_{ij})]^2}{nj}} \quad (10)$$

199

200 where, if  $k = 1, j = 1, \dots, na$ ; if  $k = 2, j = 1, \dots, nd$ ; if  $k = 3, j = 1, \dots, nf$ ; if  $k = 4, j = 1, \dots, na$ ; and  
201  $na$  is the highest assumed value for  $j$ ;  $nd$  and  $nf$  represent the number of unfavorable and  
202 favorable environments, respectively;  $ide(\hat{g}_{ij})$  is the ideotype drawn from the standardized  
203 genotypic values.

204 It is important to emphasize that the estimators proposed above also considered the  
205 stability of the genotypes' behavior in relation to the ideotype, through the invariance in multi-  
206 environment trials (MET).

207 We recommend evaluating the performance only in those genotypes that present an  
208 accuracy value of at least 80 % in the trials, since the accuracy is indicative of the precision in  
209 the prediction of genotypic values. Thus, the average accuracy of the trials considered in the  
210 cultivar recommendation will also show values equal to or greater than 80 %. The standard  
211 value is based on that of Resende and Duarte [23], who claimed to have at least 80 % accuracy  
212 values in VCU trials, when assessing the values of their cultivars.

213

## 214 **Application of the method with *Phaseolus vulgaris L.***

215

### 216 **Genetic material**

217

218 We evaluated 105 common bean cultivars (*Phaseolus vulgaris L.*), 56 of which were  
219 Carioca grains and 49 were Black grains. These are the cultivars that have been recommended  
220 in Brazil by breeding programs since 1959. The cultivars used, as well as the institutions of  
221 origin and year of recommendation, are listed in S1 and S2 tables (supporting information).

222

## 223 **Trials**

224

225           The trials were conducted in different environments (seasons, years, and places), during  
226 the dry and winter seasons, between 2013 and 2018, at the Experimental Stations in Coimbra  
227 county – Minas Gerais (Unidade de Ensino, Pesquisa e Extensão - UEPE Coimbra: latitude  
228 20°49'44" S, longitude 42°45'56" W and altitude of 713 meters) and Viçosa – Minas Gerais  
229 (Aeroporto, latitude 20°44'38" S, longitude 42°50'40" W and altitude of 654 meters; Horta  
230 Nova: latitude 20°45'47" S, longitude 42°49'25" W and altitude of 664 meters; Vale da  
231 Agronomia: latitude 20°46'04" S, longitude 42°52'11" W and altitude of 662 meters), thus each  
232 MET consisted of 13 trials. Over the years in which the trials were carried out, the cultivars that  
233 were recently launched by the breeding programs were included, thus causing a genetic  
234 imbalance (variation in the number of cultivars in the trials). The 13 trials and their  
235 characteristics are listed in S3 table (supporting information).

236           The trials were designed in randomized blocks with three replications. The plots  
237 consisted of four lines of two meters (m), spaced 0.5 m apart. The treatments used were in  
238 accordance with the recommendations for common bean cultures [24]. The evaluated  
239 characteristic was grain yield, and they were harvested from the two central lines of each plot.  
240 The data were corrected to 13 % humidity and converted to kg ha<sup>-1</sup>.

241

## 242 **Data analysis**

243

244 To create and organize the environmental gradient, the 13 trials were classified as  
245 favorable or unfavorable, according to the environmental index (Eq. 1). We adjusted 14 reaction  
246 norm models to identify the model that best quantifies the behavior of the cultivars for grain  
247 yield in the MET, with trials ordered according to the environmental index. Among these  
248 models, seven were tested considering the homogeneous residual variance and the other seven  
249 with heterogeneous diagonal residual variance. The models were adjusted with Legendre's  
250 polynomials, considering the various adjustment orders and based on the general model  
251 presented in Eq. 2.

252 Different degrees of orthogonal Legendre polynomials were fitted to determine the best  
253 model (lowest mean square error and greater parsimony). The reaction norm models were  
254 compared using the AIC (Eq. 3), BIC (Eq. 4), and PAL (Eq. 5) criteria. The LRT test, presented  
255 in Eq. 6, was used to test the significance of the genetic effects. The genotypic values for each  
256 cultivar (BLUP), in each trial, were predicted according to Eq. 7. Prediction accuracy was  
257 estimated according to Eq. 8.

258 By using the BLUPs, the adaptability and stability of the cultivars were determined,  
259 aiming at the recommendations of the cultivars. In this way, we have calculated the probabilities  
260 for the recommendations of the cultivars, using the distance of the genotypes in the functions  
261 of the ideotypes. The probability values were obtained using Eq. 9.

262 To view the results, the ten cultivars with the highest probability were selected to plot  
263 their curves with their respective reaction norms, for the three ideotypes, as we chose not to  
264 include ideotype IV, since it makes no sense to recommend cultivars of minimal adaptability.  
265 The BLUP of each cultivar was added, plus the environment average, and the general average,  
266 as well as two witnesses, Pérola (Carioca bean) and Ouro Negro (Black bean), for comparison  
267 purposes. These two cultivars were selected as witnesses, as they are used as references for the

268 productivity and quality of grain in consumer markets for the Carioca and Black beans,  
269 respectively [25]. The accuracy values (S4 table) and recommendation probability values (S5  
270 table) are available in the supporting information.

271

## 272 **Software used**

273

274 The joint analysis was carried out using ASREML software [26]. The study of the  
275 adaptability and stability of cultivars was carried out using R [27]. The code for the analyses is  
276 available in the S1 code.

277

## 278 **Results**

279

280 The environmental index values, according to Finlay and Wilkinson [4], are shown in  
281 table 1. Positive index values indicate favorable environments, while negative values indicate  
282 unfavorable ones [3]. Trials 12, 9, 4, 10, 8, and 6 were classified as unfavorable environments,  
283 while trials 5, 2, 3, 7, 1, 11, and 13 were favorable

284

285

286

287

288

289 **Table 1: Trials evaluated with their environmental index.**

| <b>Trial</b> | <b>Description</b>            | <b>Environmental gradient</b> |
|--------------|-------------------------------|-------------------------------|
| 12           | Dry/2017/Aeroporto            | -1028.89                      |
| 9            | Dry/2016/UEPE Coimbra         | -868.67                       |
| 4            | Winter/2013/Vale da Agronomia | -607.25                       |
| 10           | Winter/2016/UEPE Coimbra      | -500.76                       |
| 8            | Dry/2016/Aeroporto            | -466.43                       |
| 6            | Winter/2015/UEPE Coimbra      | -167.35                       |
| 5            | Dry/2015/UEPE Coimbra         | 31.02                         |
| 2            | Dry/2013/Vale da Agronomia    | 106.80                        |
| 3            | Winter/2013/Coimbra           | 127.71                        |
| 7            | Dry/2016/UEPE Coimbra         | 259.39                        |
| 1            | Dry/2013/Coimbra              | 486.60                        |
| 11           | Winter/2016/Horta Nova        | 758.98                        |
| 13           | Winter/2017/UEPE Coimbra      | 1868.83                       |

290

291 We found that the different criteria (AIC, BIC, and PAL) pointed to different models as  
292 having a better fit. The AIC criterion identified model Leg.6.D, which has a diagonal structure  
293 for the residues and a grade six for the Legendre polynomials, as having the best fit (Table 2).  
294 The BIC and PAL criteria however, identified the Leg.5.D model as having the best fit. The  
295 AIC and BIC criteria prioritize, respectively, efficiency and consistency in their choices of  
296 model [28,29]. Corrales et al. [29], using simulated data, reported that when the true model was  
297 among the candidate models, the PAL and BIC criteria selected the same model. Furthermore,  
298 when the PAL and AIC criteria were used, the model selection was not always the same. When  
299 the real model was unknown, the AIC was more precise in choosing the best model, compared  
300 to the BIC. According to Vrieze [30], for very complex models (which include a high number  
301 of parameters) the BIC criterion was preferred over the AIC. Corrales et al. [29] stated that the

302 PAL criterion simultaneously considers the consistency and efficiency of a model and should,  
 303 therefore, be preferred over the AIC and BIC criteria when choosing models. The model  
 304 ultimately chosen was Leg.5.D.

305 Based on the chosen model (Leg.5.D), the random effects of the cultivars were modeled  
 306 as linear functions using the Legendre polynomials, with grade five and heterogeneous residual  
 307 variance (diagonal). This resulted in 34 estimated parameters, 13 of which were associated with  
 308 residues, that is, one for each trial, and 21 related to the model's genotypic components. It is of  
 309 note that the genetic effect was significant with the LRT test for all fitted models, indicating  
 310 high variability between the cultivars evaluated (Table 2).

311

312 **Table 2. Different fitted models using the Legendre polynomials (Leg).**

| Model <sup>1</sup> | DEG | p  | LOG L     | AIC   | BIC   | PAL   | LRT    |
|--------------------|-----|----|-----------|-------|-------|-------|--------|
| Leg.0.H            | 0   | 2  | Converged | 11307 | 11319 | 11303 | 377.68 |
| Leg.1.H            | 1   | 4  | Converged | 11288 | 11312 | 11280 | 400.6  |
| Leg.2.H            | 2   | 7  | Converged | 11255 | 11299 | 11257 | 438.8  |
| Leg.3.H            | 3   | 11 | Converged | 11218 | 11286 | 11229 | 484.1  |
| Leg.4.H            | 4   | 16 | Converged | 11191 | 11291 | 11217 | 520.7  |
| Leg.5.H            | 5   | 22 | Converged | 11150 | 11286 | 11197 | 574.5  |
| Leg.6.H            | 6   | 29 | Converged | 11134 | 11315 | 11243 | 603.7  |
| Leg.0.D            | 0   | 14 | Converged | 11007 | 11094 | 10979 | 507.6  |
| Leg.1.D            | 1   | 16 | Converged | 10983 | 11083 | 10951 | 534.9  |
| Leg.2.D            | 2   | 19 | Converged | 10928 | 11046 | 10930 | 595.9  |
| Leg.3.D            | 3   | 23 | Converged | 10865 | 11008 | 10885 | 667.2  |
| Leg.4.D            | 4   | 28 | Converged | 10740 | 10914 | 10779 | 802.7  |
| Leg.5.D            | 5   | 34 | Converged | 10648 | 10859 | 10730 | 906.2  |
| Leg.6.D            | 6   | 41 | Converged | 10645 | 10900 | 10881 | 922.9  |

313 Model structure, degree polynomial for the genetic effect (DEG), number of parameters (p),  
314 LOG L convergence, Akaike information criterion (AIC), Schwarz Bayesian information  
315 criterion (BIC), Penalizing adaptively the likelihood (PAL) and Likelihood Ratio Test (LRT).

316 <sup>1</sup>The tested models can assume homogeneous (H) or diagonal (D) residual variance structure.

317 The average accuracy for the prediction of the BLUPs for each cultivar, based on the  
318 Leg.5.D model, are shown in Fig 1. We found that the average accuracy of predictions was  
319 greater when more trials were used to evaluate the cultivars. The accuracy observed for the  
320 cultivars that were present in the 13 environments was the highest, while the accuracy estimates  
321 for the cultivars evaluated in only two environments were the lowest. It can also be seen in  
322 figure 1, that in trials six and eight (ordered according to the environmental gradient), the  
323 accuracy estimates were relatively low. It is also noteworthy that the estimates of genotypic  
324 variance in these two trials were also lower than in the others (data not shown). The accuracy  
325 values of each cultivar in each environment are available in S4 table (supporting information).

326

327 **Fig 1: Average accuracy of the prediction in each trial for the genotypic values of the**  
328 **cultivars.**

329 a) Cultivars evaluated in 13 trials (80 cultivars); b) cultivars evaluated in nine trials (20  
330 cultivars); c) cultivars evaluated in six trials (four cultivars); and d) cultivars evaluated in only  
331 two trials (one cultivar). The trials are ordered according to the environmental index (Table 1).

332

333 Using the proposed reaction norm methodology, the adaptability and stability of 100 of  
334 the 105 cultivars was quantified. These 100 cultivars were evaluated in at least nine of the 13  
335 trials, with the accuracy in predicting their genotypic values, equal to or greater than 80 %,  
336 including for those trials in which the cultivars were not evaluated (S4 table).



337 According to Eq. 9, the cultivars were recommended by comparing them with the four  
338 proposed ideotypes (four scenarios): cultivars of general adaptability, cultivars of maximum  
339 adaptability to unfavorable environments, cultivars of maximum adaptability to favorable  
340 environments, and cultivars of minimal adaptability. The probability values of each cultivar in  
341 each scenario are presented in S5 table.

342 Fig 2 shows the reaction norm curves of the ten bean cultivars with the highest potential  
343 (highest probability value), considering the general adaptability scenario (ideotype - maximum  
344 performance genotypes in both unfavorable and favorable environments), as well as the  
345 cultivars used as witnesses (Pérola and Ouro Negro). The probability of each cultivar was  
346 calculated according to eq. 9, in relation to the ideotype for the scenario of general adaptability.  
347 Among the ten selected cultivars, six had the Carioca grain type (BRS Estilo, IAC Formoso,  
348 IAC Imperador, IPR Andorinha, IPR Campos Gerais and VC 15), and four had the Black grain  
349 type (BRS Agreste, IPR Tiziu, IPR Tuiuiu and VP 22). The IPR Campos Gerais cultivar  
350 surpassed the Pérola cultivar in all trials, while the VP 22 cultivar surpassed the Ouro Negro  
351 cultivar in all trials.

352

353 **Fig 2: Cultivars of Carioca and Black bean of general adaptability according to the**  
354 **ideotype.**

355 The trials are ordered according to the environmental index (Table 1). \*Cultivars used as  
356 witnesses.

357

358 The reaction norm curves of the ten bean cultivars with the greatest potential (highest  
359 probability value), considering the scenario of maximum adaptability to unfavorable  
360 environments (ideotype - maximum performance genotypes in unfavorable environments,

361 regardless of their performance in favorable environments), as well as the cultivars used as  
362 witnesses, are presented in Fig 3. Of the ten selected cultivars, seven had Carioca grain (BRS  
363 Estilo, IAC Formoso, IAC Imperador, IPR Andorinha, IPR Campos Gerais, IPR Tangará and  
364 VC 15) and three had Black grain (IPR Tiziu, IPR Tuiuiú and VP 22). The cultivar IPR Campos  
365 Gerais surpassed the cultivar Pérola in all trials, and the IPR Tuiuiú, IPR Tiziu, and VP 22  
366 cultivars exceeded the Ouro Negro cultivar.

367

368 **Fig 3: Cultivars of Carioca and Black bean of maximum adaptability for unfavorable**  
369 **environments according to the ideotype.**

370 The trials are ordered according to the environmental index (Table 1). \*Cultivars used as  
371 witnesses.

372 In Fig 4, the reaction norm curves for the ten cultivars with the highest potential (highest  
373 probability value), considering the scenario of maximum adaptability to favorable  
374 environments (ideotype - maximum performance genotypes in favorable environments,  
375 regardless of their performance in unfavorable environments), as well as the cultivars used as a  
376 witness, are shown. Of the ten selected cultivars, seven had Carioca grain (BRS Estilo, IAC  
377 Formoso, IAC Imperador, IPR Andorinha, IPR Campos Gerais, IPR 139 and VC 15) and three  
378 had Black grain (IPR Agreste, IPR Tuiuiú and VP 22). The IPR Campos Gerais cultivar  
379 surpassed the Pérola cultivar, in all trials, and the IPR Agreste, IPR Tuiuiú, and VP 22 black  
380 bean cultivars exceeded the Ouro Negro cultivar, in all trials.

381

382 **Fig 4: Cultivars of Carioca and Black bean of maximum adaptability for favorable**  
383 **environments according to the ideotype.**

384 The trials are ordered according to the environmental index (Table 1). \*Cultivars used as  
385 witnesses.

386

## 387 **Discussion**

388

389 Rating the variations of a set of trials, according to an environmental gradient, is  
390 essential when using methods based on linear regression that aim to quantify the adaptability  
391 of a cultivar. Finlay and Wilkinson [4] proposed using the average performances of the cultivars  
392 in each trial as a gradient, and estimating an environmental index using the differences between  
393 the average of the cultivars evaluated in each trial and the general average of the cultivars in all  
394 trials. Additionally, the fit of the regression model for each cultivar was made according to its  
395 performance, relative to the environmental index, in order to increase the values. The lack of  
396 an environmental gradient complicates the interpretation of the behavior of the genotypes in the  
397 face of the environmental variations [4].

398 When classifying the trials with the environmental index (in favorable or unfavorable  
399 environments), it was observed that the seasons, places, and years in which the trials were  
400 conducted did not determine the classification, as the trials from the same place and year could  
401 have very different results (trials 7 and 9), while those from different seasons, places, and years  
402 could be very similar (for example, environments 1 and 11). It should be noted that trial 9 was  
403 planted 44 days after trial 7, which may be one of the justifications for the different  
404 environmental index values. These results could be caused by edaphoclimatic variations, as  
405 well as variations in the incidence of pests and diseases in the environments in which the  
406 cultivars were evaluated, resulting in genotype by environment interactions (GEI). Several

407 authors have also previously [31–34] reported the influence of these factors on the  
408 environmental classification. For Ramalho et al. [35], the most significant contributions to the  
409 GEI in the bean cultures were due to the combinations of cultivar  $\times$  season and cultivar  $\times$  years.

410 The development of methods to model GEI is coupled with the availability of more  
411 genotypic and environmental information, in line with the advances in data collection and  
412 analysis. The first analyses were based on analysis of variance [36,37], with a single parameter  
413 to interpret the adaptability and stability. The advances with the development of new  
414 methodologies however, are based on regression analysis, with interpretations based on more  
415 parameters, such as the average, the regression coefficient, the regression deviation, and new  
416 definitions of adaptability and stability [4,7,38].

417 Currently, the effects of genotypes and environmental conditions can be modeled by  
418 phenotypic values in regression with genetic markers and in environmental covariates, via  
419 mixed models [39]. However, these models based on regression, consider a priori that the  
420 genotype behavior is predetermined, based on linear regression equations, which may not  
421 equate to the genotypes actual behavior. Thus, reaction norm models in conjunction with  
422 Legendre polynomials are used to establish the order of the polynomials of the regression  
423 parameters later, according to the behavior of the genotypes in a series of environments (in a  
424 MET). Additionally, the mixed model approach also allows for the genotypic values of  
425 individuals to be predicted, as adaptability and stability are genotypic, and not phenotypic.

426 The use of reaction norm models associated with the use of orthogonal polynomials has  
427 been used mainly in animal breeding, defined as random regression, where the behavior of the  
428 genotypes over a period of time is described, mainly using covariance function information  
429 [40–42]. However, there are only a few studies in the literature that use reaction norm models  
430 with plants.

431           According to Ni et al. [43], reaction norm models allow for the adjustment of an  
432 individual's genetic effects with their exposure to the environmental effects, so that the  
433 genotypes are adjusted as a nonlinear function of a continuous environmental gradient. The  
434 adjustment of reaction norm models, as a function of the environmental gradient, considering  
435 Legendre polynomials, captures more adequately the behavior of the genotypes in a MET. The  
436 fact that an individuals' behavior is not predetermined, is an advantage of the proposed  
437 methodology in relation to the traditional methods of analysis of adaptability and stability.

438           To quantify the adaptability and stability using reaction norm models, the prediction  
439 accuracy represents the reliability in the evaluation of the behavior of the evaluated genotypes  
440 in different environments. In this work, most of the accuracy estimates obtained for each  
441 cultivar in each environment were greater than 80 %, which also resulted in an average accuracy  
442 of the 13 trials that was higher than this value. In the VCU trials, Resende and Duarte [23]  
443 recommended that the accuracy should be at least 80 %. Other previous investigations have  
444 also highlight the importance of prediction accuracies, using the reaction norm models in plant  
445 breeding experiments [39,44,45].

446           Another advantage of the proposed methodology, using reaction norm models, is the  
447 prediction of genotypic values for the cultivars for environments in which they were not  
448 evaluated, when the MET presents genetic imbalance. When using experiments with  
449 unbalanced data, or just a sample of the cultivars, the prediction accuracy estimates tend to be  
450 lower, and the model may not be efficient in evaluating the performance of the cultivars [46,47].  
451 Cargnelutti Filho and Storck [48], affirmed that the accuracy has a direct relationship with the  
452 genotypic variance, and an inverse relationship with the residual variance. In this investigation,  
453 we observed accuracy estimates of at least 80 %, when the cultivars were evaluated in at least  
454 9 of the 13 environments (Figure 1).

455 For Smith et al. [49], using accurate information for the behavior of the cultivars,  
456 allowed breeders to choose the best varieties, according to the needs of farmers, in order to  
457 maximize profitability and food security. One of the difficulties in assessing the behavior of a  
458 group of cultivars over MET was due to the fact that new genotypes were included in the trials  
459 over the years, in addition to the loss of information due to problems that occurred over the  
460 trials, resulting in genetic and statistical imbalances. In this context, Resende [16,50] states that  
461 the mixed model approach is a better alternative, for the analysis of such trials.

462 As noted, only 12 cultivars of superior performance were found in Fig 2-4, with eight  
463 carioca bean cultivars and four black bean cultivars, instead of 30 cultivars (10 per figure). This  
464 was because there were some cultivars that were widely adaptable and highly stable that were  
465 selected for more than one scenario, such as the IPR Campos Gerais and IPR Tuiuiú.

466 Cultivars with high phenotypic averages for high yield were identified, but they were  
467 not included in figures 2, 3, and 4, as those selected by the reaction norm models. This can be  
468 explained by the fact that the methodology when calculating the probability of each cultivar  
469 that was based on the cultivar-ideotype distance penalizes cultivars that showed great variation  
470 in their productivity during the trials, even if they presented high general averages. Thus, the  
471 reaction norm models can also quantify the stability of cultivars, defined as the variation across  
472 environments. Eeuwijk et al. and Van Oijen and Höglind [12,51] also reported this property of  
473 reaction norms. It is also worth mentioning that the use of the ideotype that was established  
474 from the data itself, had the advantage of comparing the genotypes with a real situation observed  
475 for that MET, since the ideotype is defined as the maximum value predicted in each trial.

476 The reaction norms, based on the mixed models, can also model the heterogeneity of  
477 the genetic variations and correlations between the environments, in addition to the spatial  
478 trends in the trials [22]. Furthermore, these models allow for more accurate estimations of the

479 genotypes in the trials, as well as better estimations of the genetic parameters, such as  
480 heritability, variances, covariances, and genetic correlations, while they become more difficult  
481 in models with only fixed effects [12].

482 VCU tests are the basis for the recommendation of a cultivar and it is required that they  
483 are carried out in various locations, seasons, and years of the macro-region where the cultivar  
484 is being recommended. Thus, the recommended cultivars are those with higher general averages  
485 across the environments, that is, wide adaptability. Cultivars with these behavior, beyond the  
486 interests of the breeders making the recommendations, are also of interest to the farmers, as  
487 beans are mostly cultivated by small farmers, who buy grains from other producers and regions  
488 to use as seed. Thus, there is often an overlap and lack of control as to what the planting season  
489 and region actually are for a cultivar, and its official recommendations [52].

490 It is expected that cultivars with maximum adaptability to unfavorable environments  
491 will be more desirable for these unstructured conditions. These environments can be described  
492 as having low levels of technological investment, which can be normal in small-scale  
493 agriculture [3]. In addition, adverse conditions caused by the climate, such as a lack or excess  
494 of rain and incidence of pests and diseases also contribute to the characterization of  
495 environments as unfavorable. Thus, it is desirable that cultivars that are recommended for  
496 unfavorable environments maintain a satisfactory standard of productivity, even in stressful  
497 situations, whether this is due to a lack or excess of any factor. However, in a situation of  
498 improvement of the environment, these cultivars will not be responsive to this increment of  
499 environmental quality. This illustrates the definition of adaptability as presented by Cruz et al.  
500 [3], as the differential response of cultivars due to a stimulus from the environment.

501 However, for the cultivars that are identified for favorable environments, we see the  
502 opposite behavior. It is expected that cultivars adapted to these locations would normally

503 respond satisfactorily to environmental improvements, reaching high levels of yield in order to  
504 return the investment made, since these environments have high technological use, such as  
505 irrigation and precision agriculture, and are commonly run by large scale practices. However,  
506 with inferior conditions, such as climatic adversity, they tend to have low production [3]. It was  
507 observed that the strains VP 22 and VP 33 showed superior performance in environments  
508 classified as favorable. The fact that the experiments conducted by the Programa Feijão - UFV,  
509 who are responsible for the selection of these strains and always utilize optimal cultivation  
510 conditions (fertilization, irrigation, and pest and disease control), may explain this.

511           The maintenance of productivity in different environments is explained by the response  
512 to the environmental stimulus, being caused by the differential expression of the genes present  
513 in each individual. In this way, the adaptability and stability indicated in the reaction norm  
514 curves of the cultivars, provides information regarding their capacity to express phenotypes that  
515 may better adjust to the environmental conditions [53]. In this sense, one way to improve the  
516 adaptability of cultivars to the different environments in which they will be cultivated, is to  
517 pyramid the genes of maximum expression in both the unfavorable and favorable environments.  
518 The superior cultivars in each studied scenario were developed in different breeding programs  
519 from four institutions (EMBRAPA, UFV, IAC, and IAPAR). This is indicative of the effort and  
520 success of these breeding programs, as well as the genetic diversity between them, since the  
521 breeding programs are independent, with their own parental lines. Possobom [54] demonstrated  
522 that cultivars originating from the same institution are usually more related, while cultivars  
523 from different institutions belong to different groups of dissimilarity. Thus, these outstanding  
524 cultivars also have the potential to be used in bean improvement programs.

525

## 526 **Conclusion**



527

528           The reaction norm methodology to evaluate the adaptability and stability of cultivars  
529 appears to be an alternative in the evaluation of multi-environment trials, since it enables  
530 genetic and statistical imbalances to be addressed, as well an improved evaluation of cultivar  
531 behavior.

532

## 533 **Acknowledgments**

534

535           We would like to thank the students of the Programa Feijão for their contribution with  
536 the help of data collection for this work. We would like to thank the CNPq (Conselho Nacional  
537 de Desenvolvimento Científico e Tecnológico), FAPEMIG (Fundação de Amparo à Pesquisa  
538 do Estado de Minas Gerais) and CAPES (Coordenação de Aperfeiçoamento de Pessoal de Nível  
539 Superior) agencies for their financial support. We would like to thank Editage  
540 (www.editage.com) for English language editing.

541

## 542 **References**

543

- 544 1. Borém A, Miranda GV. Melhoramento de Plantas. 5th ed. Viçosa, MG: Editora UFV;  
545 2009.
- 546 2. MAPA. Formulários para Registro de Cultivares — Ministério da Agricultura, Pecuária  
547 e Abastecimento. 2019 [cited 10 Jan 2019]. Available:

- 548 <http://www.agricultura.gov.br/assuntos/insumos-agropecuarios/insumos->  
549 [agricolas/sementes-e-mudas/registro-nacional-de-cultivares-2013-rnc-1/formularios-](http://www.agricultura.gov.br/assuntos/insumos-agropecuarios/insumos-agricolas/sementes-e-mudas/registro-nacional-de-cultivares-2013-rnc-1/formularios-)  
550 [para-registro-de-cultivares](http://www.agricultura.gov.br/assuntos/insumos-agropecuarios/insumos-agricolas/sementes-e-mudas/registro-nacional-de-cultivares-2013-rnc-1/formularios-)
- 551 3. Cruz CD, Regazzi AJ, Carneiro PCS. Modelos Biométricos Aplicados ao Melhoramento  
552 Genético. 4th ed. Viçosa, MG: Editora UFV; 2012.
- 553 4. Finlay K, Wilkinson G. The analysis of adaptation in a plant-breeding programme. Aust  
554 J Agric Res. 1963;14: 742. doi:10.1071/AR9630742
- 555 5. Eberhart SA, Russell WA. Stability Parameters for Comparing Varieties<sup>1</sup>. Crop Sci.  
556 1966;6: 36. doi:10.2135/cropsci1966.0011183x000600010011x
- 557 6. Verma MM, Chahal GS, Murty BR. Limitations of conventional regression analysis a  
558 proposed modification. Theor Appl Genet. 1978;53: 89–91. doi:10.1007/BF00274335
- 559 7. Cruz CD., Torres RD., Vencovsky R. An alternative approach to the stability analysis  
560 proposed by Silva and Barreto. Rev Bras Genética. 1989;12: 567–580.
- 561 8. Rocha RB, Muro-Abad JI, Araújo EF, Cruz CD. Avaliação do método centróide para  
562 estudo de adaptabilidade ao ambiente de clones de *Eucalyptus grandis*. Ciência Florest.  
563 2005;15: 255–266. Available:  
564 <https://periodicos.ufsm.br/cienciaflorestal/article/view/1863/1110>
- 565 9. Nascimento M, Ferreira A, Mota Campana AC, Salgado CC, Cruz CD. Multiple  
566 Centroid Methodology to analyze genotype adaptability. Crop Breed Appl Biotechnol.  
567 2009;9: 8–16. Available: [https://search.proquest.com/docview/1936359411?pq-](https://search.proquest.com/docview/1936359411?pq-origsite=gscholar)  
568 [origsite=gscholar](https://search.proquest.com/docview/1936359411?pq-origsite=gscholar)
- 569 10. Nascimento M, Ferreira A, Nascimento ACC, Silva FF e, Ferreira R de P, Cruz CD, et  
570 al. Multiple centroid method to evaluate the adaptability of alfalfa genotypes. Rev Ceres.

- 571 2015;62: 30–36. doi:10.1590/0034-737X201562010004
- 572 11. Oliveira RL de, Von Pinho RG, Ferreira DF, Pires LPM, Melo WMC. Selection index  
573 in the study of adaptability and stability in maize. *Sci World J.* 2014;2014: 1–6.  
574 doi:10.1155/2014/360570
- 575 12. Eeuwijk FA Van, Bustos-korts D V, Malosetti M. What Should Students in Plant  
576 Breeding Know About the Statistical Aspects of Genotype ´ Environment Interactions ?  
577 *Crop Sci.* 2016;56: 2119–2140. doi:10.2135/cropsci2015.06.0375
- 578 13. Gauch HG. Statistical analysis of regional yield trials : AMMI analysis of factorial  
579 designs. 1st ed. Gauch HGJ, editor. Ithaca, NY: Elsevier; 1992.
- 580 14. Yan W, Hunt LA. Interpretation of genotype X environment interaction for winter wheat  
581 yield in Ontario. *Crop Sci.* 2001;41: 19–25. Available:  
582 <https://pubag.nal.usda.gov/catalog/1341185>
- 583 15. Resende MD. Genética biométrica e estatística no melhoramento de plantas perenes.  
584 Brasília, DF: Embrapa Informação Tecnológica; 2002.
- 585 16. Resende MDV de. Análise Estatística de Modelos Mistos via REML/BLUP na  
586 Experimentação em Melhoramento De Plantas Perenes. Documentos. Colombo, PR:  
587 Embrapa Florestas; 2000. Available:  
588 <https://ainfo.cnptia.embrapa.br/digital/bitstream/item/17057/1/doc47.pdf>
- 589 17. Kirkpatrick M, Heckman N. A quantitative genetic model for growth, shape, reaction  
590 norms, and other infinite-dimensional characters. *J Math Biol.* 1989;27: 429–450.  
591 Available: [https://link-springer-](https://link-springer-com.ez35.periodicos.capes.gov.br/content/pdf/10.1007%2F00290638.pdf)  
592 [com.ez35.periodicos.capes.gov.br/content/pdf/10.1007%2F00290638.pdf](https://link-springer-com.ez35.periodicos.capes.gov.br/content/pdf/10.1007%2F00290638.pdf)
- 593 18. Akaike H. A new look at the statistical identification model. *A new look Stat Identif*

- 594 Model. 1974;19: 716.
- 595 19. Wolfinger R. Covariance structure selection in general mixed models. *Commun Stat -*  
596 *Simul Comput.* 1993;22: 1079–1106. doi:10.1080/03610919308813143
- 597 20. Stoica P, Babu P. Model order estimation via penalizing adaptively the likelihood (PAL).  
598 *Signal Processing.* 2013;93: 2865–2871. doi:10.1016/J.SIGPRO.2013.03.014
- 599 21. Rao CR. *Linear statistical inference and its application.* New York: John Wiley and Sons;  
600 1965. Available: <https://academic.oup.com/jlms/article-abstract/s1-42/1/382/844079>
- 601 22. Kirkpatrick M, Lofsvold D, Bulmer M. Analysis of the inheritance, selection and  
602 evolution of growth trajectories. *Genetics.* 1990;124.
- 603 23. Resende MDV de, Duarte JB. Precisão e controle de qualidade em experimentos de  
604 avaliação de cultivares. *Pesqui Agropecuária Trop.* 2007;37: 182–194. Available:  
605 [file:///C:/Users/Sandrinho/Downloads/artículo\\_redalyc\\_253021631009.pdf](file:///C:/Users/Sandrinho/Downloads/artículo_redalyc_253021631009.pdf)
- 606 24. Carneiro JE de S, Paula Júnior TJ de, Borém A. *Feijão, do plantio à colheita.* Viçosa,  
607 MG: Editora UFV; 2015.
- 608 25. Melo CLP de, Carneiro, José Eustáquio de Souza Carneiro PCS, Cruz CD, Barros,  
609 Everaldo Gonçalves de Moreira MA. Linhagens de feijão do cruzamento “Ouro Negro”  
610 x “Pérola” com características agronômicas favoráveis. *Pesqui Agropecuária Bras.*  
611 2006;41: 1593–1598. Available:  
612 <http://www.scielo.br/pdf/%0D/pab/v41n11/a04v4111.pdf>
- 613 26. Gilmour AR, Gogel BJ, Cullis BR, Welham SJ, Thompson R. *ASReml User Guide*  
614 *Release 4.1 Structural Specification.*, VSN International Ltd, Hemel Hempstead, HP1  
615 1ES, UK [www.vsni.co.uk](http://www.vsni.co.uk). 2015. Available: [www.vsni.co.uk](http://www.vsni.co.uk)

- 616 27. Computing RF for S. R Development Core Team. Austria, vienna; 2015.
- 617 28. Yang Y. Can the strengths of AIC and BIC be shared? A conflict between model  
618 identification and regression estimation. *Biometrika*. 2005;92: 937–950.  
619 doi:10.1093/biomet/92.4.937
- 620 29. Corrales JD, Munilla S, Cantet RJC. Polynomial order selection in random regression  
621 models via penalizing adaptively the likelihood. *J Anim Breed Genet*. 2015;132: 281–  
622 288. doi:10.1111/jbg.12130
- 623 30. Vrieze SI. Model selection and psychological theory: A discussion of the differences  
624 between the Akaike information criterion (AIC) and the Bayesian information criterion  
625 (BIC). *Psychol Methods*. 2012;17: 228–243. doi:10.1037/a0027127
- 626 31. Barili LD, Vale NM do, Amaral R de C, Carneiro JE de S, Silva FF e, Carneiro PCS.  
627 Adaptabilidade e estabilidade e a produtividade de grãos em cultivares de feijão preto  
628 recomendadas no Brasil nas últimas cinco décadas. *Ciência Rural*. 2015;45: 1980–1986.  
629 doi:10.1590/0103-8478cr20141383
- 630 32. Melo LC, Guimarães P, Melo S, Faria LC De, Luiz J, Diaz C. Interação com ambientes  
631 e estabilidade de genótipos de feijoeiro-comum na Região Centro-Sul do Brasil. *Pesqui  
632 Agropecu Bras*. 2007; 715–723.
- 633 33. Moura MM, Carneiro PCS, Carneiro JE de S, Cruz CD. Potencial de caracteres na  
634 avaliação da arquitetura de plantas de feijão. *Pesqui Agropecuária Bras*. 2013;48: 417–  
635 425. doi:10.1590/S0100-204X2013000400010
- 636 34. Ribeiro ND, Antunes IF, Souza JF de, Poersch NL. Adaptação e estabilidade de produção  
637 de cultivares e linhagens-elite de feijão no Estado do Rio Grande do Sul. *Ciência Rural*.  
638 2008;38: 2434–2440. doi:10.1590/S0103-84782008005000018

- 639 35. Ramalho MAP, Abreu A de FB, Santos PSJ dos. Interações genótipos x épocas de  
640 semeadura, anos e locais na avaliação de cultivares de feijão nas regiões Sul e Alto  
641 Paranaíba em Minas Gerais. *Ciência e Agrotecnologia*. 1998;22: 175–181. Available:  
642 <https://www.alice.cnptia.embrapa.br/alice/bitstream/doc/1017707/1/ca19980001.pdf>
- 643 36. Wricke G. Zur Berechnung der Ökivalenz bei Sommerweizen und Hafer.  
644 *Pflanzenzuchtung*,. 1965;52: 127–138.
- 645 37. Plaisted RL, Peterson LC. A technique for evaluating the ability of selections to yield  
646 consistently in different locations or seasons. *Am Potato J*. 1959;36: 381–385.  
647 doi:10.1007/BF02852735
- 648 38. Eberhart SA, Russell WA. Stability Parameters for Comparing Varieties1. *Crop Sci*.  
649 1966;6: 36. doi:10.2135/cropsci1966.0011183X000600010011x
- 650 39. Jarquín D, Crossa J, Lacaze X, Du Cheyron P, Daucourt J, Lorgeou J, et al. A reaction  
651 norm model for genomic selection using high-dimensional genomic and environmental  
652 data. *Theor Appl Genet*. 2014;127: 595–607. doi:10.1007/s00122-013-2243-1
- 653 40. Meyer K. Estimating covariance functions for longitudinal data using a random  
654 regression model.
- 655 41. Jamrozik J, Schaeffer LR, Dekkers JCM. Genetic Evaluation of Dairy Cattle Using Test  
656 Day Yields and Random Regression Model. *Genet Breed*. 1997. doi:10.3168/jds.S0022-  
657 0302(97)76050-8
- 658 42. Schaeffer LR. Application of random regression models in animal breeding. [cited 11  
659 Dec 2019]. doi:10.1016/S0301-6226(03)00151-9
- 660 43. Ni G, van der Werf J, Zhou X, Hyppönen E, Wray NR, Lee SH. Genotype–covariate  
661 correlation and interaction disentangled by a whole-genome multivariate reaction norm

- 662 model. *Nat Commun.* 2019;10. doi:10.1038/s41467-019-10128-w
- 663 44. Burgueño J, de los Campos G, Weigel K, Crossa J. Genomic Prediction of Breeding  
664 Values when Modeling Genotype  $\times$  Environment Interaction using Pedigree and Dense  
665 Molecular Markers. *Crop Sci.* 2012;52: 707. doi:10.2135/cropsci2011.06.0299
- 666 45. Pérez-Rodríguez P, Crossa J, Bondalapati K, De Meyer G, Pita F, Campos G de los. A  
667 pedigree-based reaction norm model for prediction of cotton yield in multienvironment  
668 trials. *Crop Sci.* 2015;55: 1143. doi:10.2135/cropsci2014.08.0577
- 669 46. Lian L, Jacobson A, Zhong S, Bernardo R. Genomewide prediction accuracy within 969  
670 maize biparental populations. *Crop Sci.* 2014;54: 1514–1522.  
671 doi:10.2135/cropsci2013.12.0856
- 672 47. Lorenzana RE, Bernardo R. Accuracy of genotypic value predictions for marker-based  
673 selection in biparental plant populations. *Theor Appl Genet.* 2009;120: 151–161.  
674 doi:10.1007/s00122-009-1166-3
- 675 48. Cargnelutti Filho A, Storck L. Medidas do grau de precisão experimental em ensaios de  
676 competição de cultivares de milho. *Pesqui Agropecuária Bras.* 2010;44: 111–117.  
677 Available: <http://seer.sct.embrapa.br/index.php/pab/article/view/1486/5654>
- 678 49. Smith AB, Ganesalingam A, Kuchel H, Cullis BR. Factor analytic mixed models for the  
679 provision of grower information from national crop variety testing programs. *Theor Appl*  
680 *Genet.* 2015;128: 55–72. doi:10.1007/s00122-014-2412-x
- 681 50. Resende MDV de. *Genética biométrica e estatística no melhoramento de plantas perenes.*  
682 *Embrapa Informação Tecnológica;* 2002. Available:  
683 [https://www.bdpa.cnptia.embrapa.br/consulta/busca?b=pc&id=306061&biblioteca=vazio&busca=autoria:%22RESENDE,](https://www.bdpa.cnptia.embrapa.br/consulta/busca?b=pc&id=306061&biblioteca=vazio&busca=autoria:%22RESENDE,M.%22&qFacets=autoria:%22RESENDE)  
684 [M.%22&qFacets=autoria:%22RESENDE,](https://www.bdpa.cnptia.embrapa.br/consulta/busca?b=pc&id=306061&biblioteca=vazio&busca=autoria:%22RESENDE,M.%22&qFacets=autoria:%22RESENDE)

685 M.%22&sort=&paginacao=t&paginaAtual=1

686 51. Van Oijen M, Höglind M. Toward a Bayesian procedure for using process-based models  
687 in plant breeding, with application to ideotype design. *Euphytica*. 2016;207: 627–643.

688 doi:10.1007/s10681-015-1562-5

689 52. Carbonell SAM et al. Adaptabilidade e estabilidade de produção de cultivares e  
690 linhagens de feijoeiro no Estado de São Paulo. *Bragantia*. 2001;60: 69–77. Available:

691 <https://www.redalyc.org/html/908/90813494002/>

692 53. Xue B, Leibler S. Benefits of phenotypic plasticity for population growth in varying  
693 environments. *Proc Natl Acad Sci U S A*. 2018;115: 12745–12750.

694 doi:10.1073/pnas.1813447115

695 54. Possobom MTD. Diversidade genética de linhagens de feijão preto e “carioca”  
696 recomendadas no Brasil nos últimos 50 anos. UFV. 2018.

697

## 698 **Supporting information**

699

700 **S1 Table. Carioca bean cultivars, institutions of origin and year of recommendation.**

701 **S2 Table: Black bean cultivars, institutions of origin and year of recommendation.**

702 **S3 Table: Description of the trials.**

703 **S4 Table: Accuracy of 105 cultivars in each trial.**

704 **S5 Table: Recommendation probability values for each cultivar in each scenario.**

705 **S1 Code: Script for analyses.**



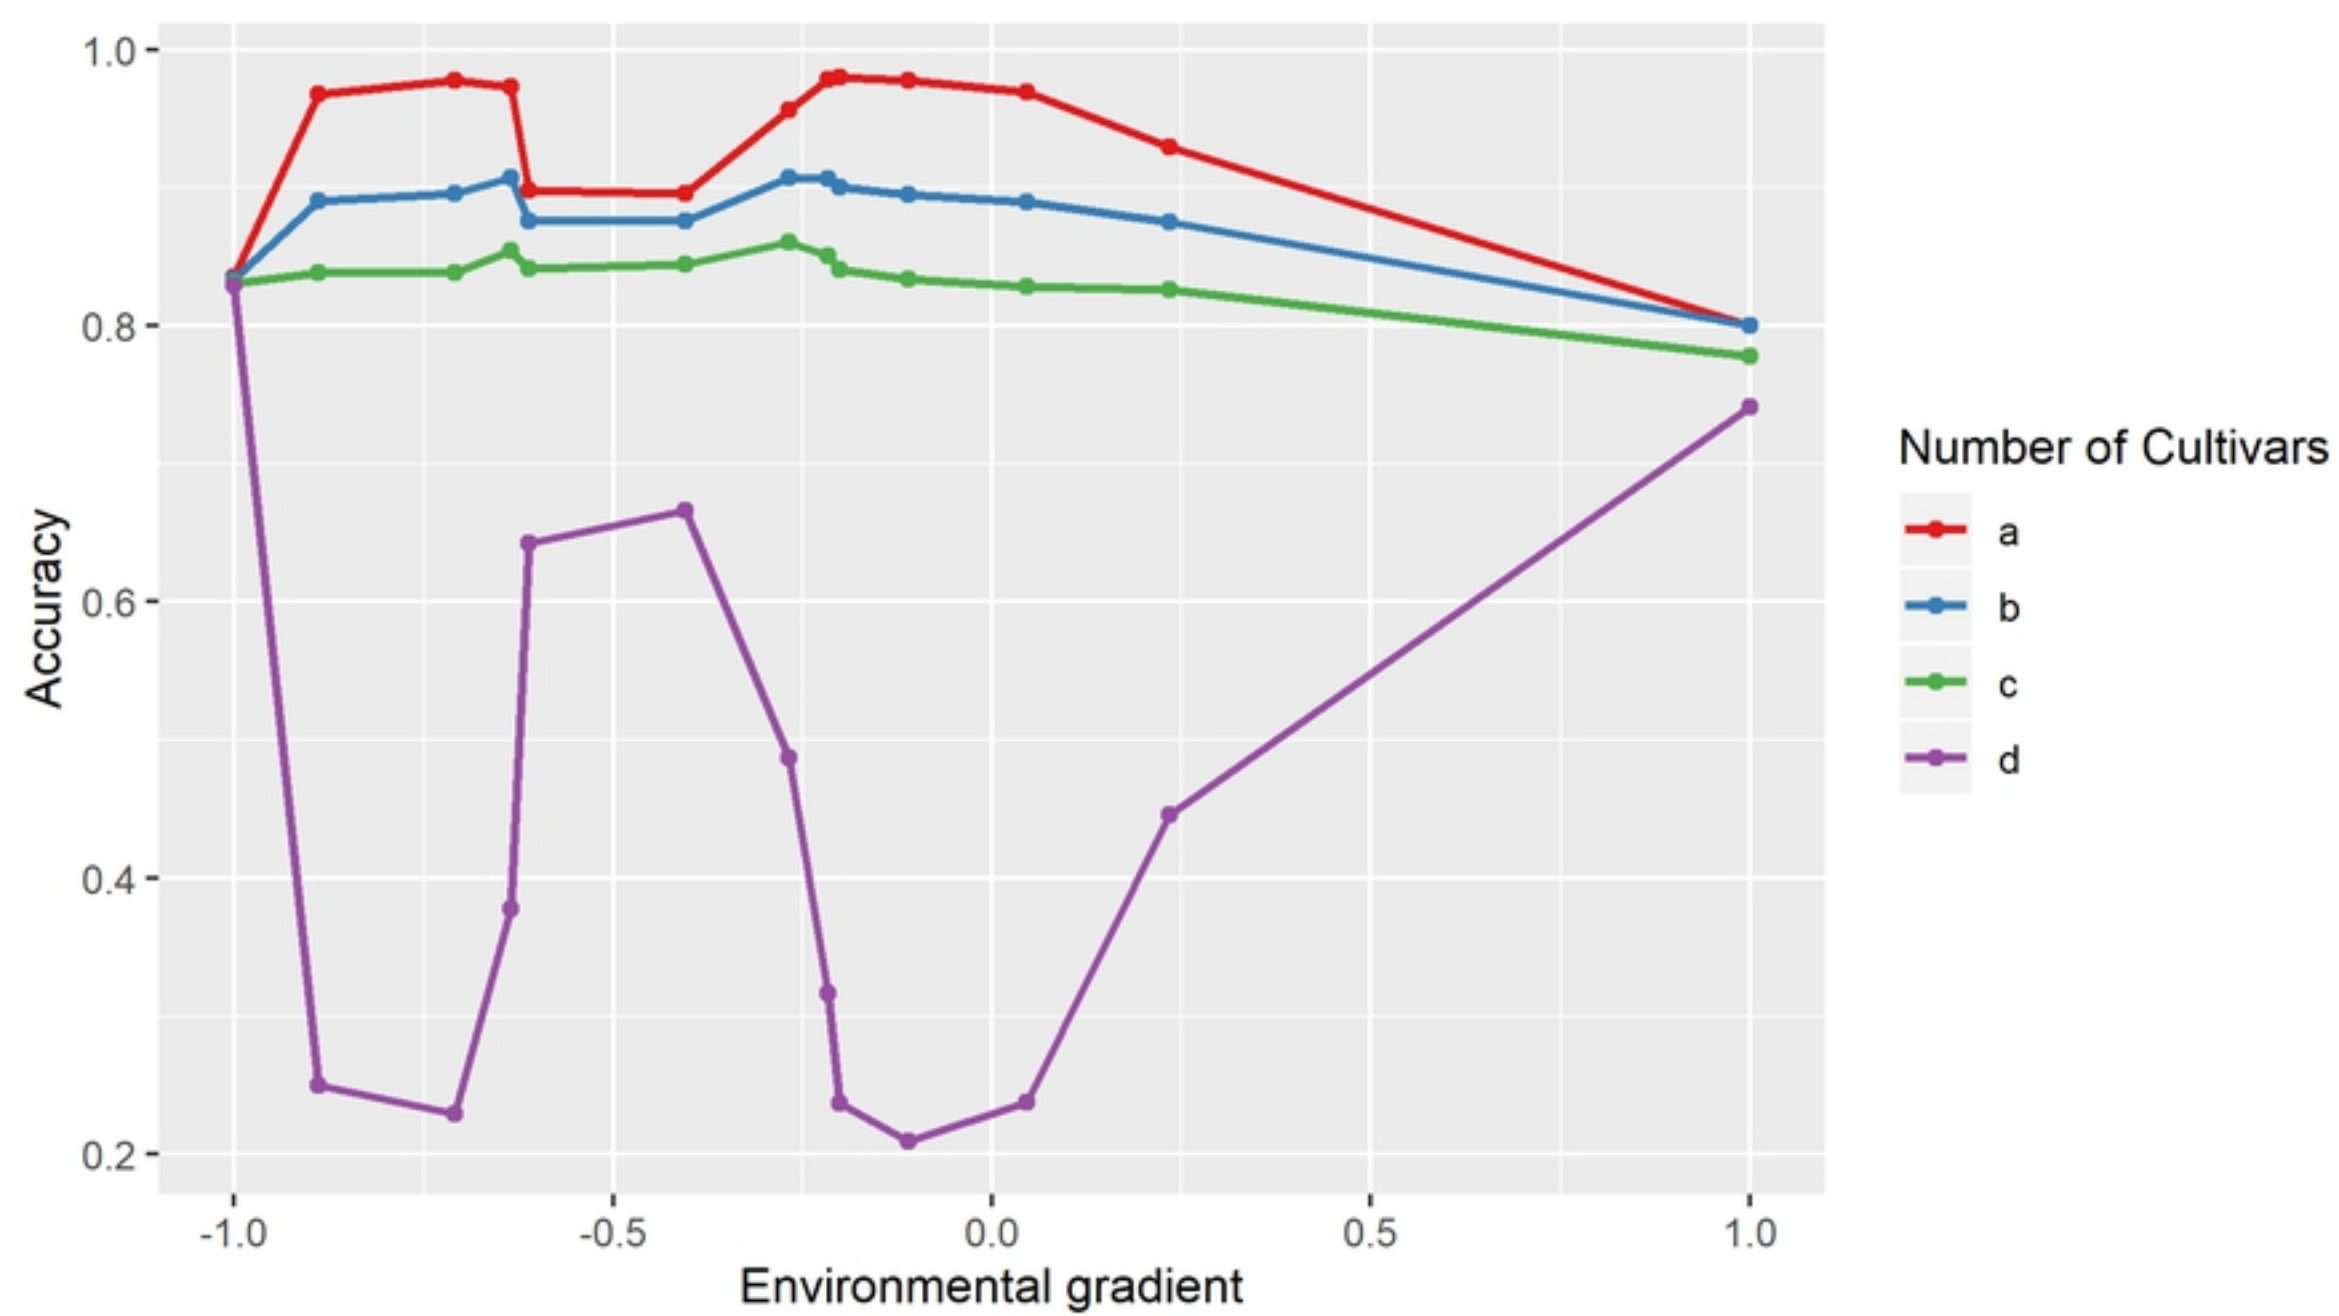

Fig 1

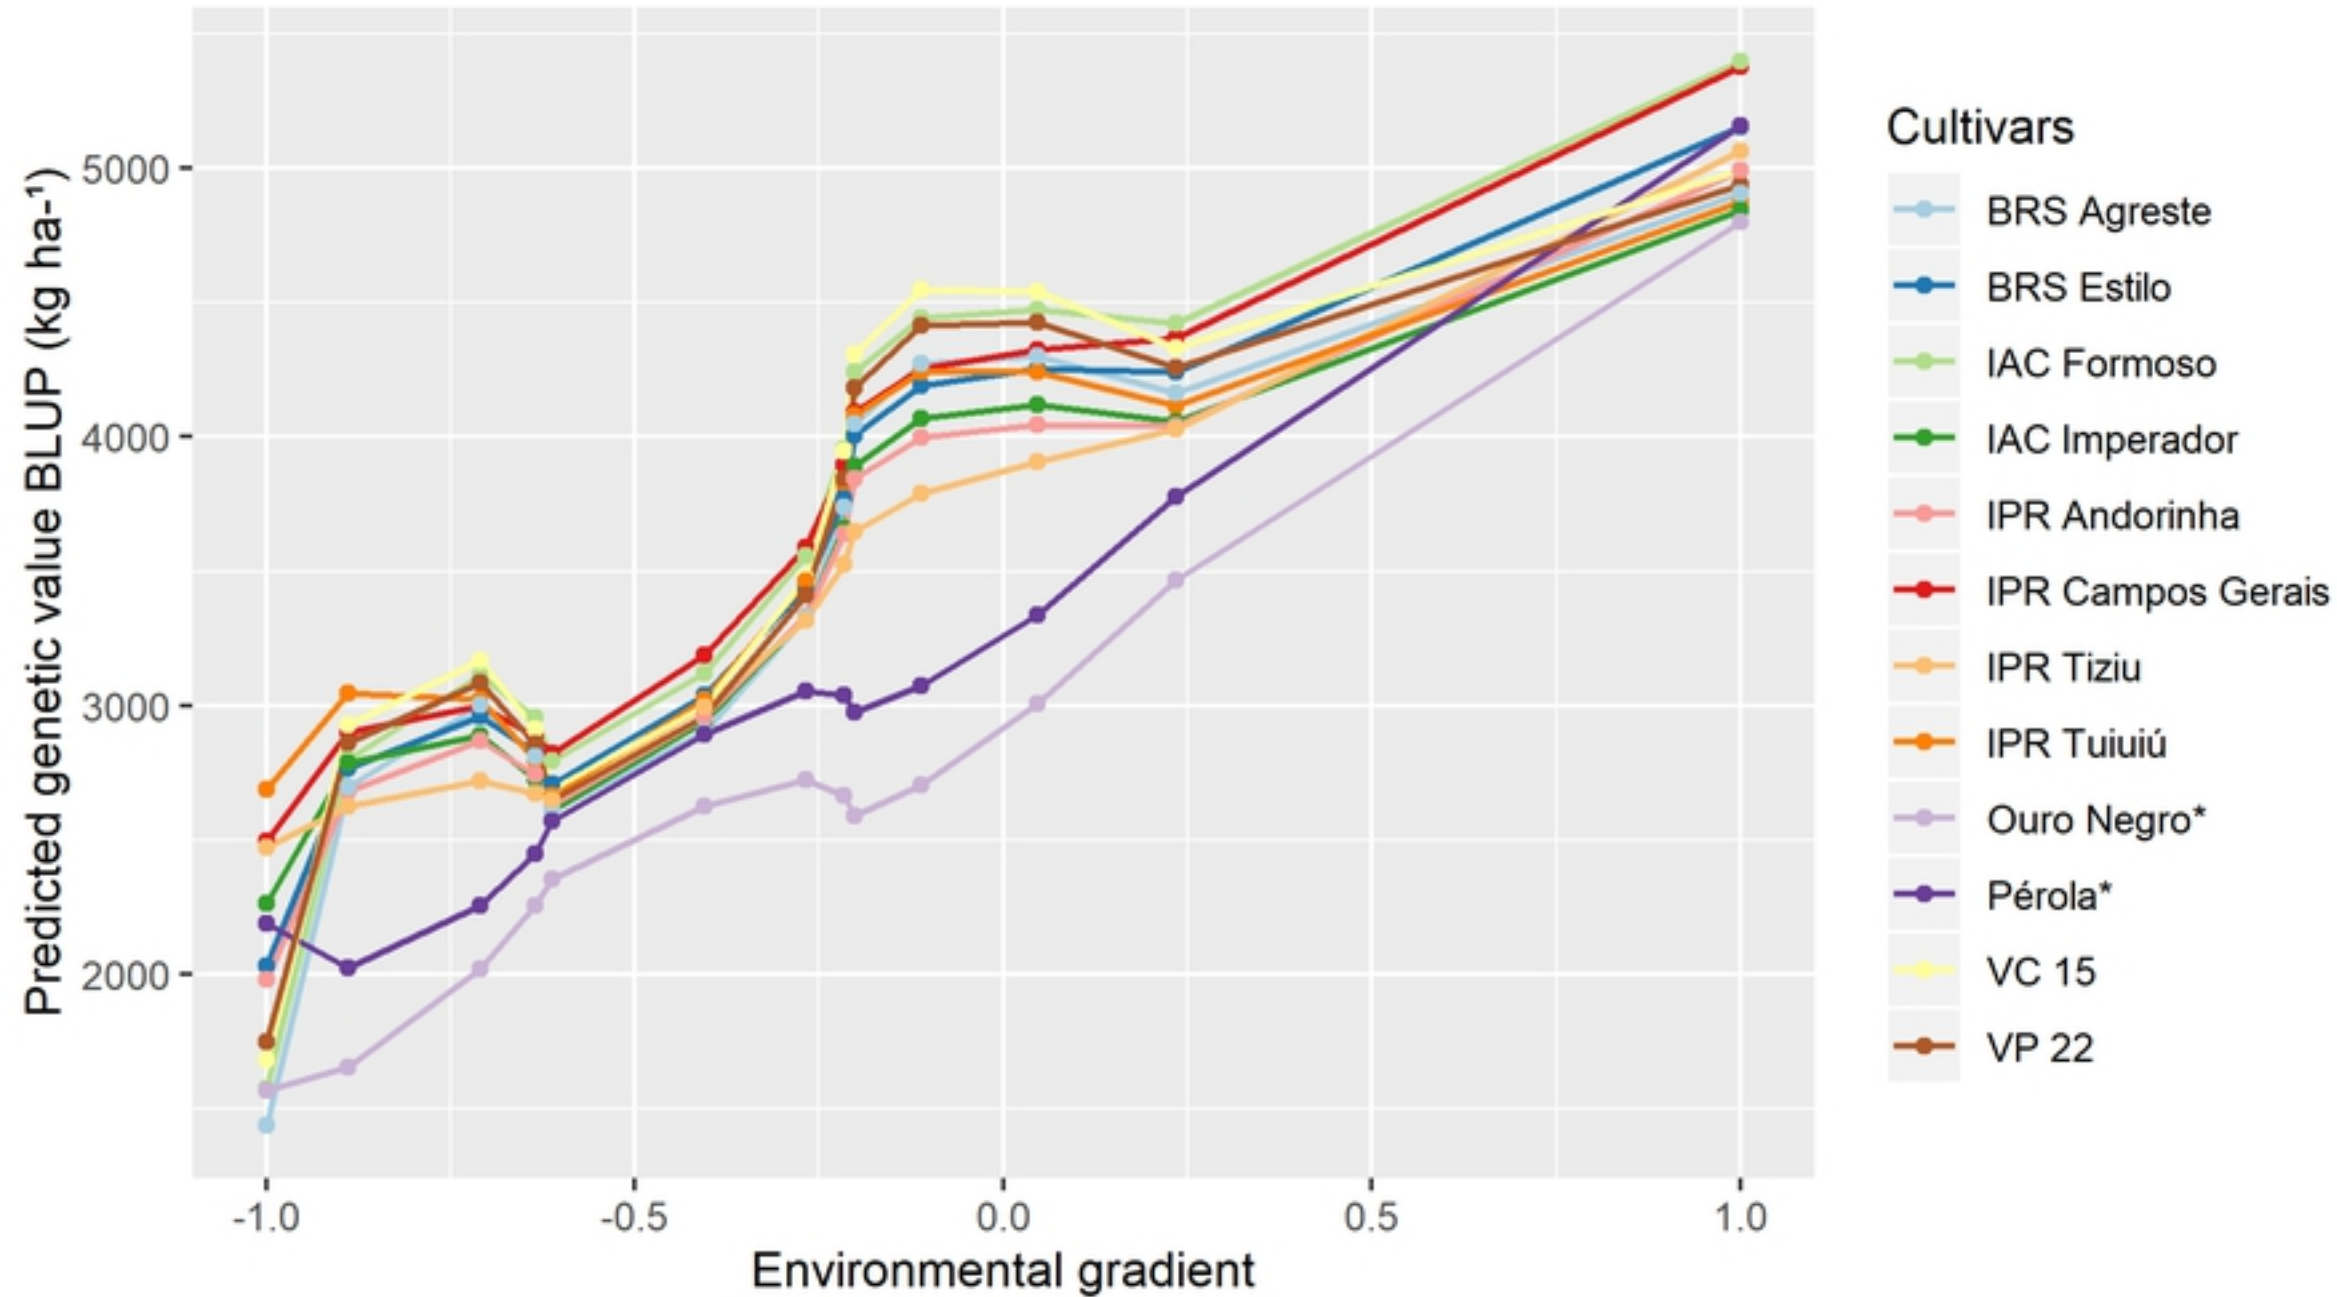

Fig 2

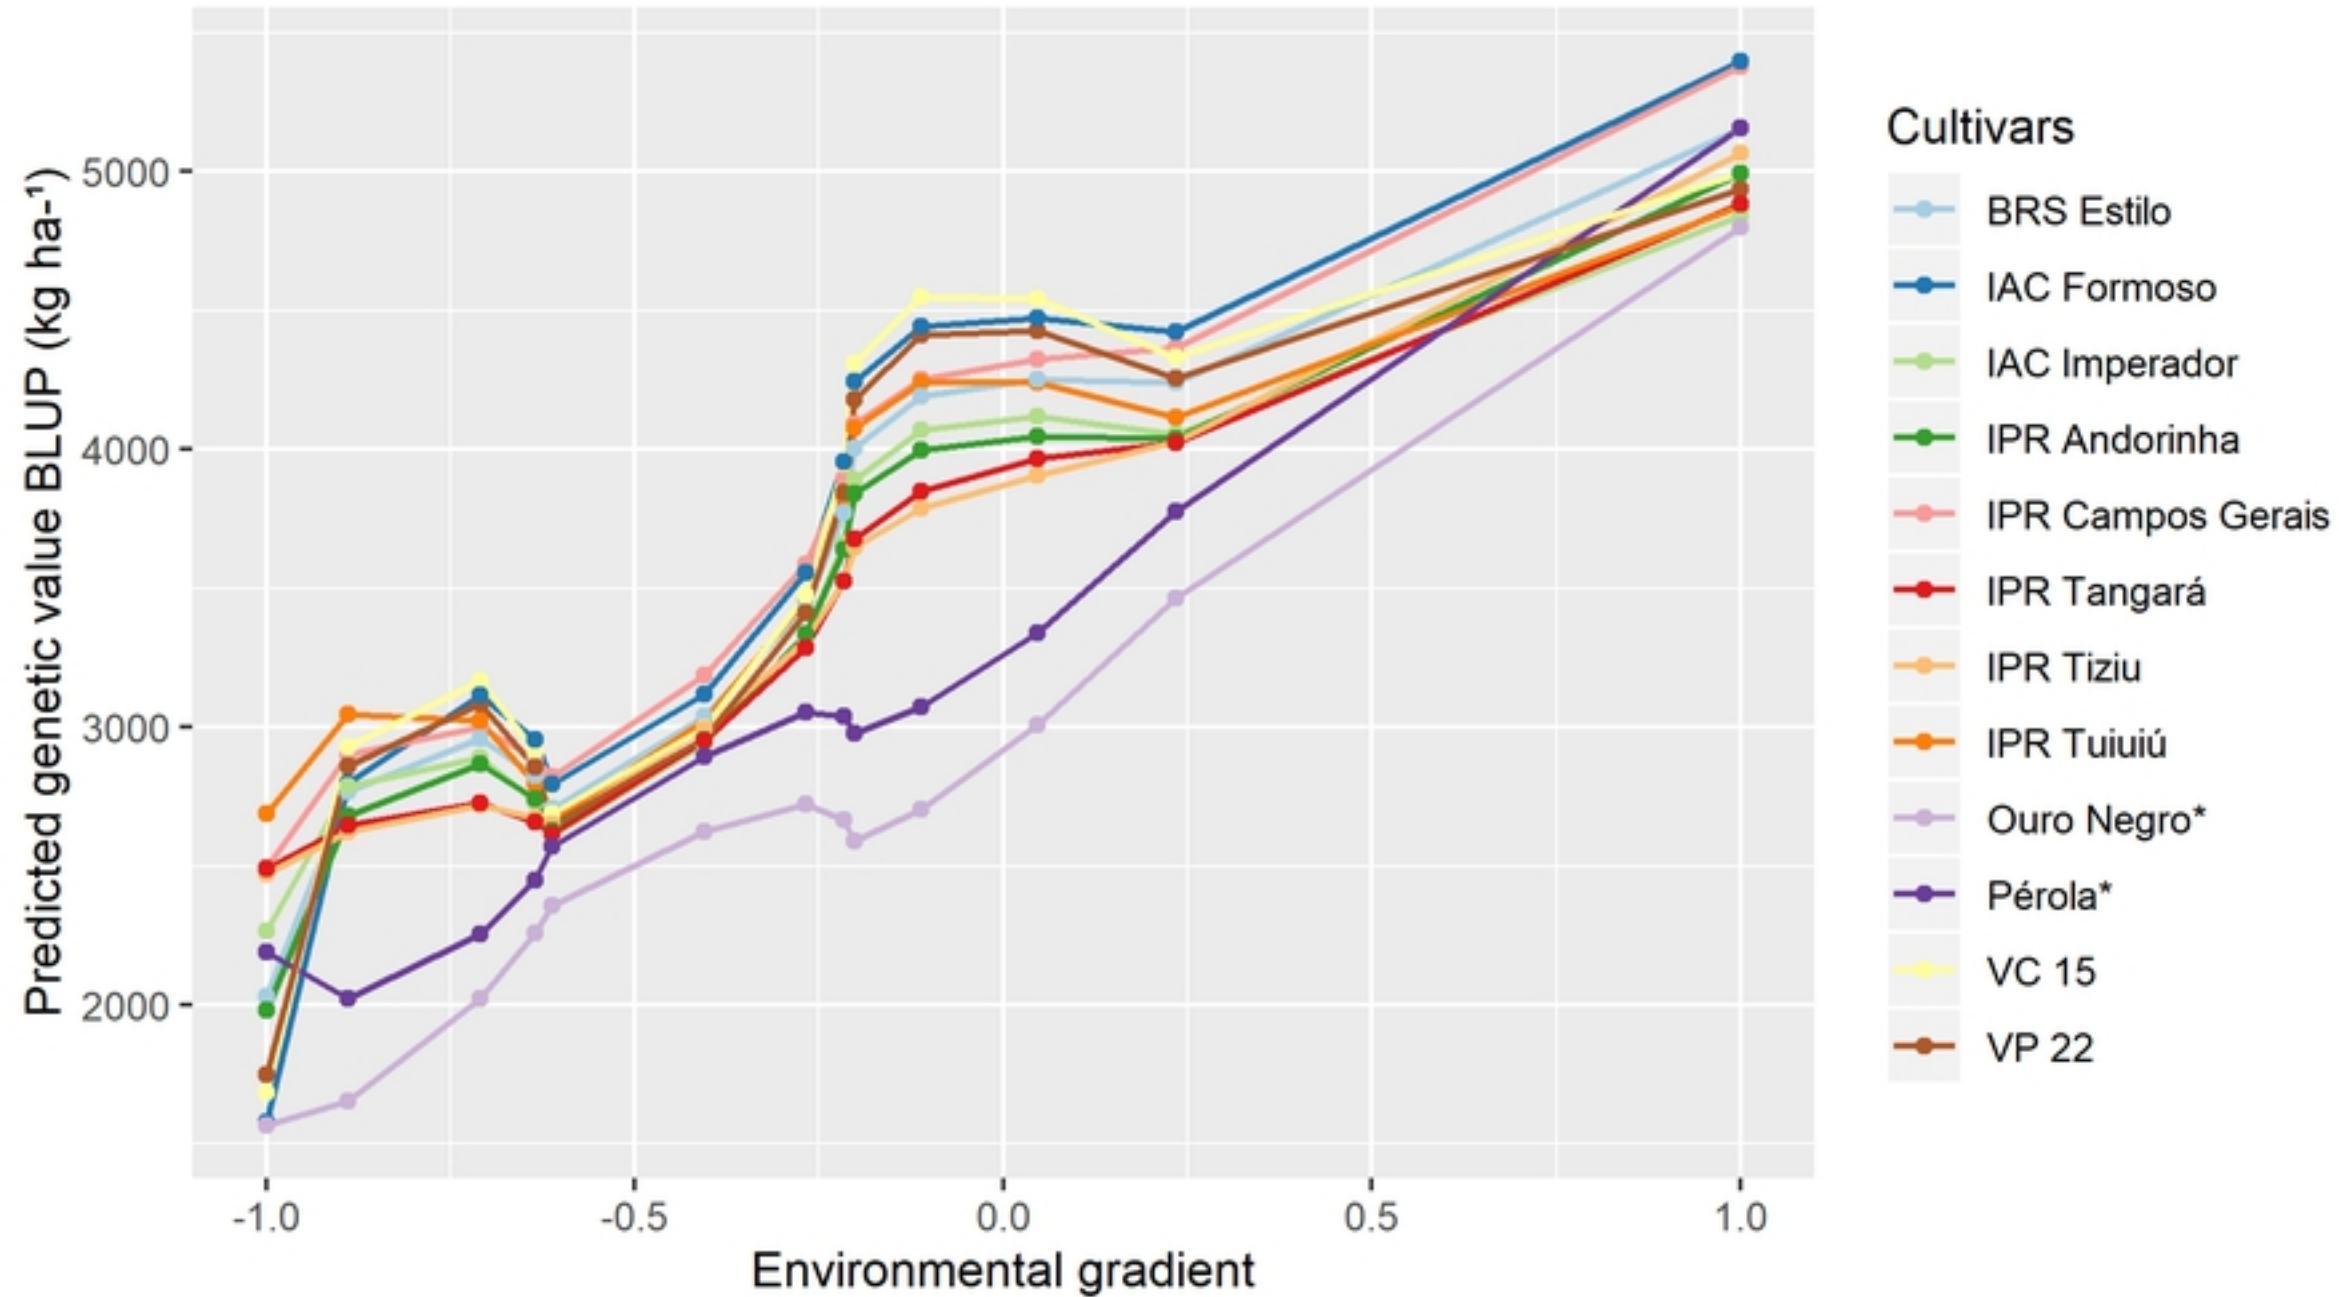

Fig 3

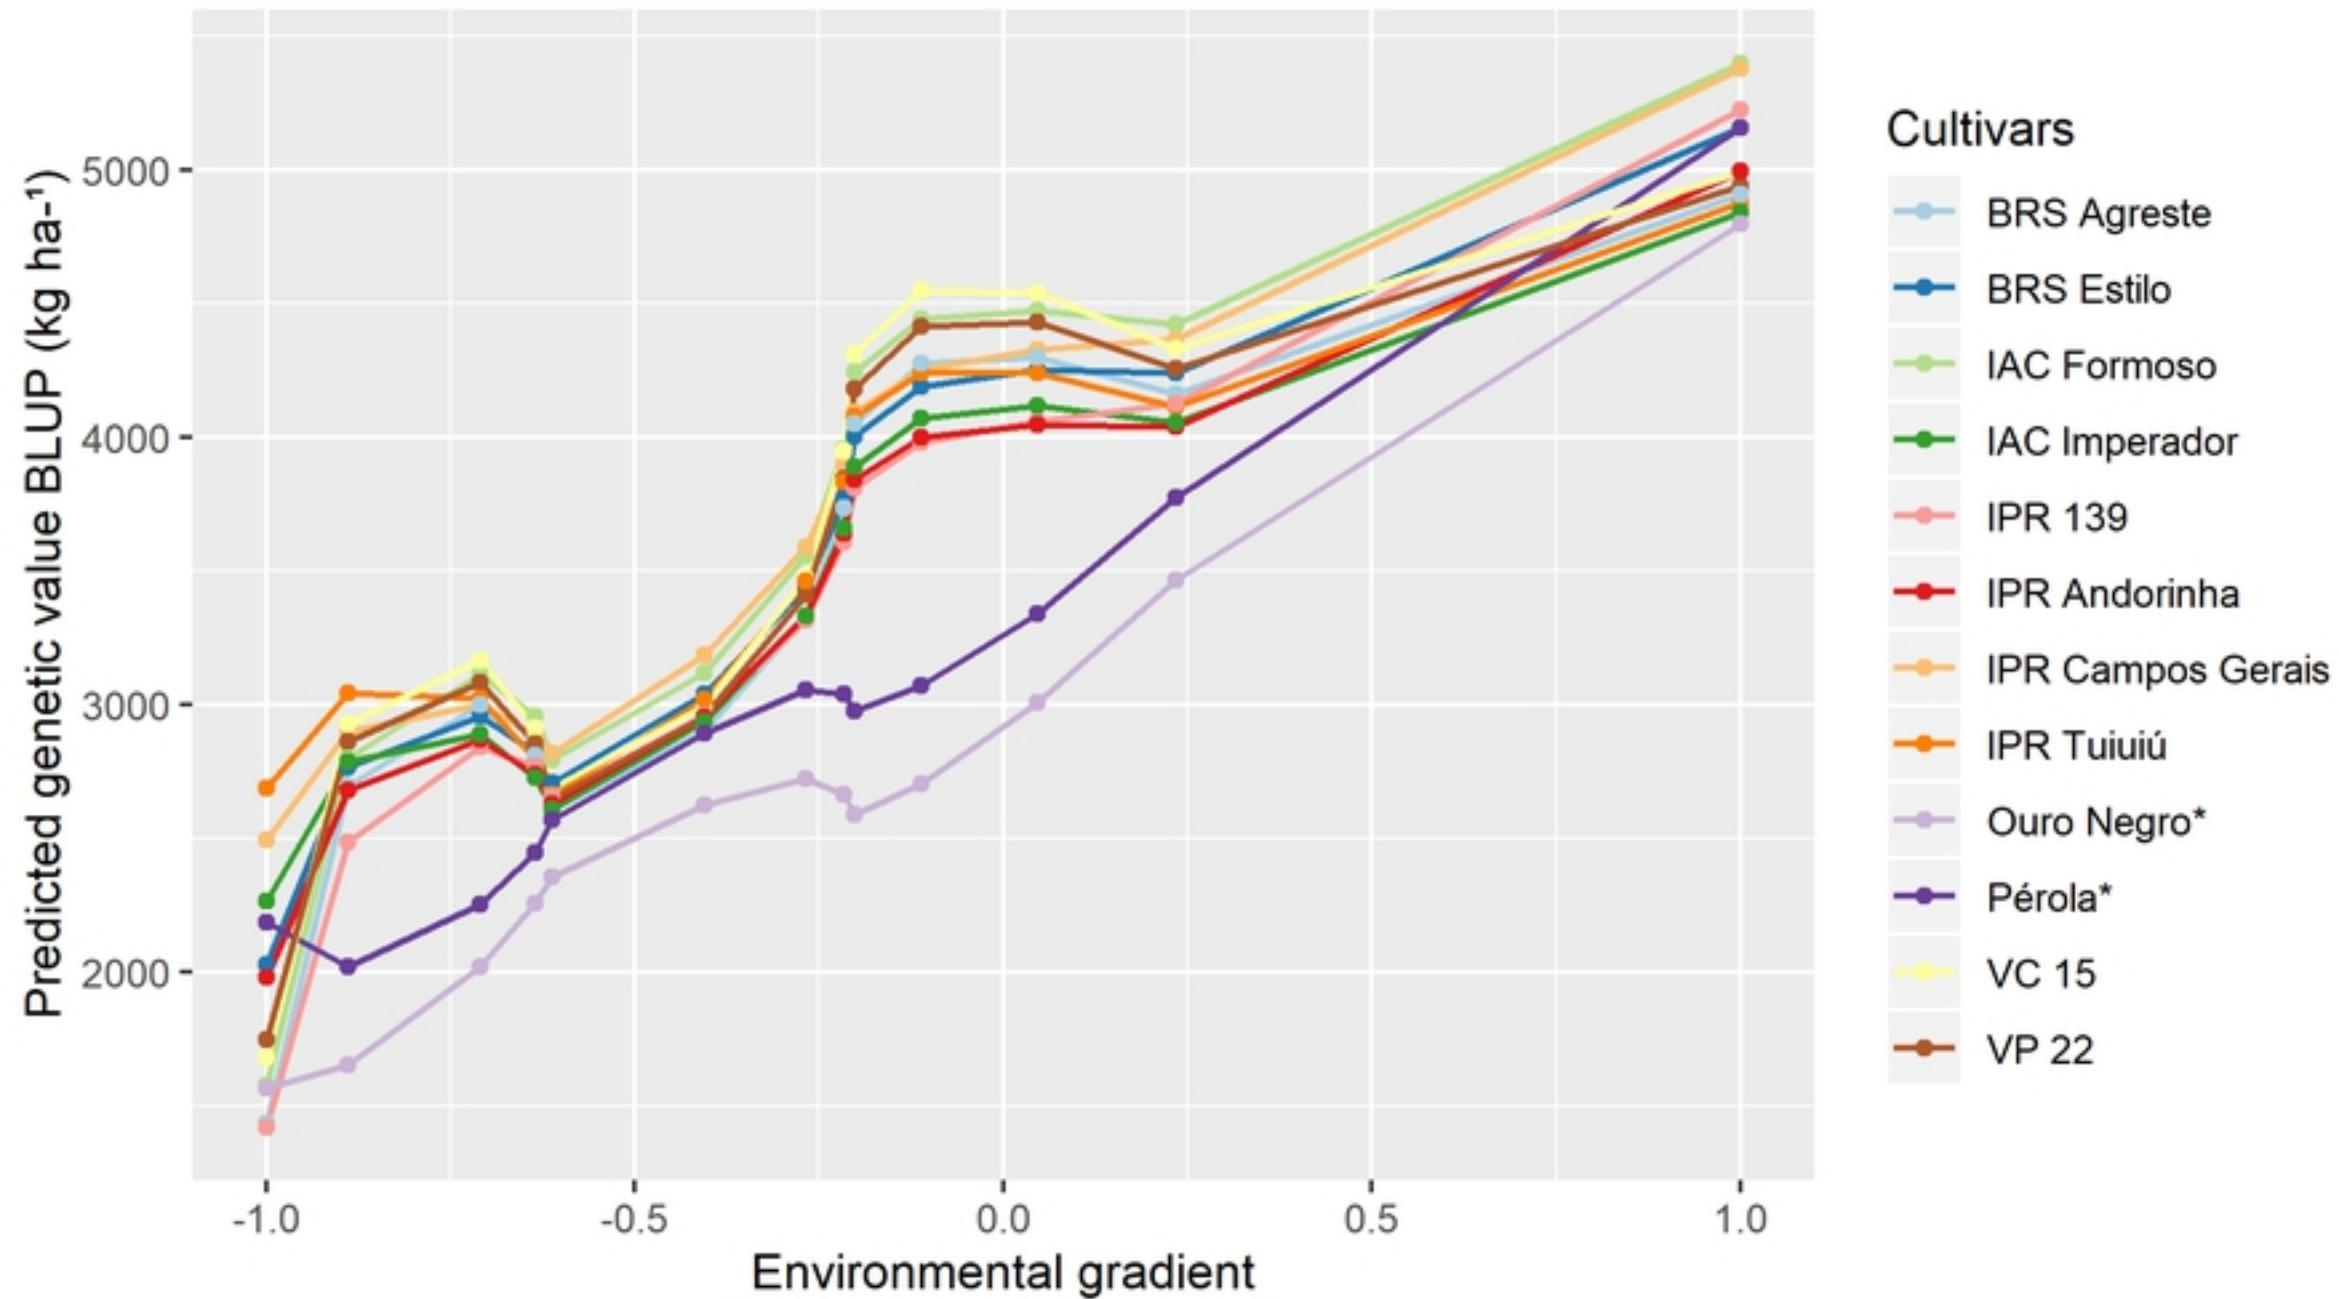

Fig 4
